# Supplementary material for: Chikungunya Manifestations and Viremia in Patients Who Presented to the Fever Clinic at Bangkok Hospital for Tropical Diseases during the 2019 Outbreak in Thailand
Source: PubMed Central journal article supplement (PMC7924391; doi:10.3390/tropicalmed6010012), 2021-01-21
Supplement: tropicalmed-06-00012-s001.pdf [file tropicalmed-06-00012-s001.pdf]

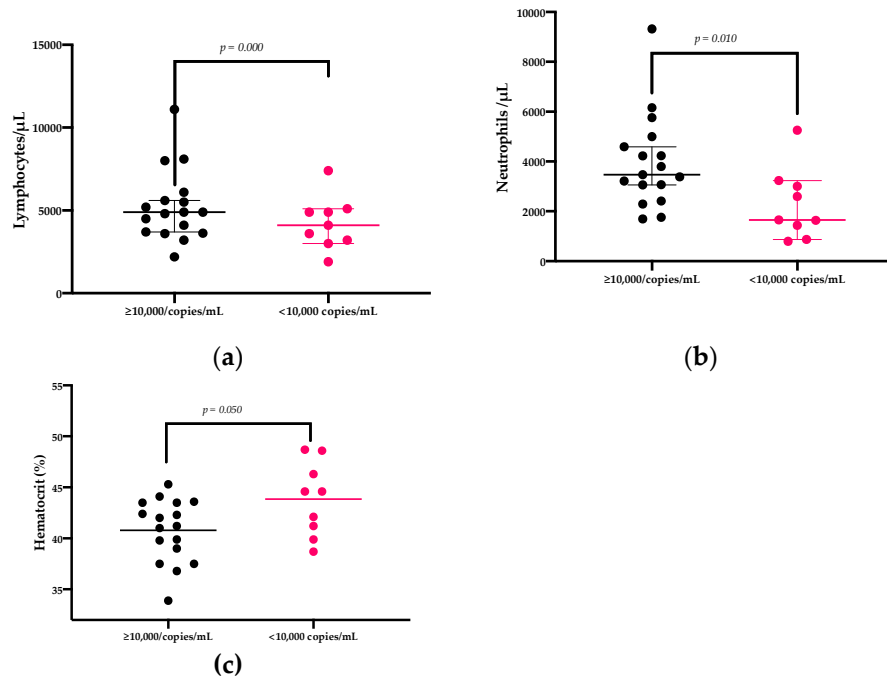

**Figure S1.** The distribution of white blood cells and hematocrit percentages with respect to the degree of viremia. (a) Lymphocytes vs. viremia, (b) Neutrophils vs. viremia, (c) Hematocrit vs. viremia.

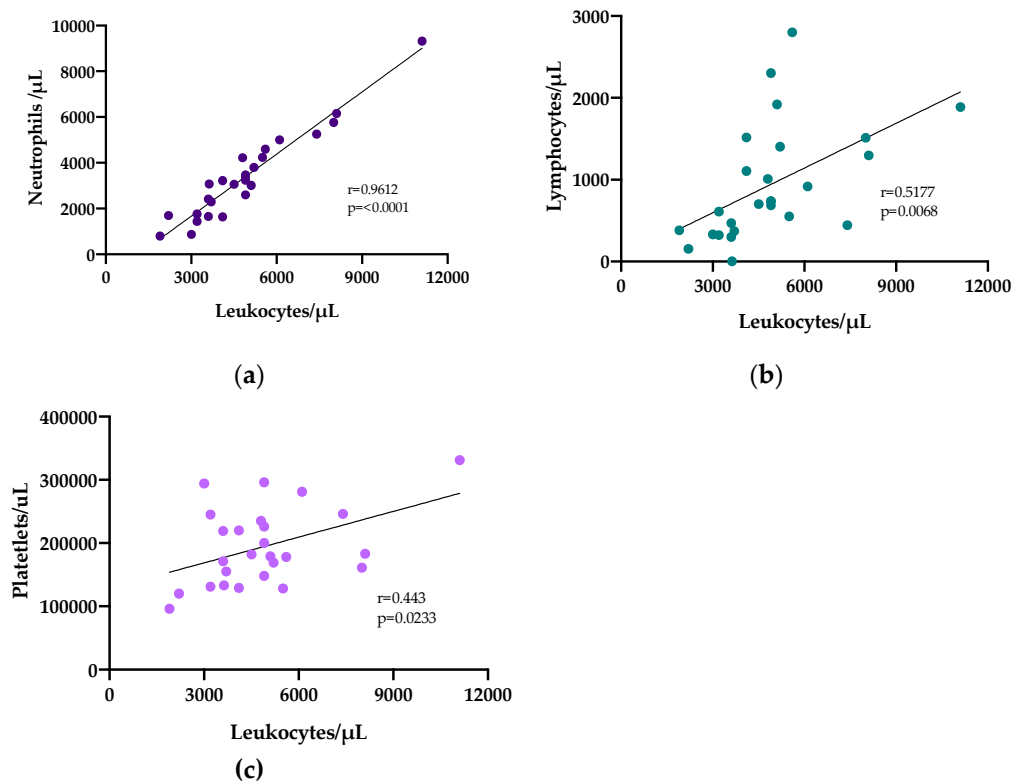

**Figure S2.** Correlation analysis of leukocytes with other blood cell indices. (a) Leukocytes vs. neutrophils, (b) Leukocytes vs. lymphocytes, (c) Leukocytes vs. platelets.

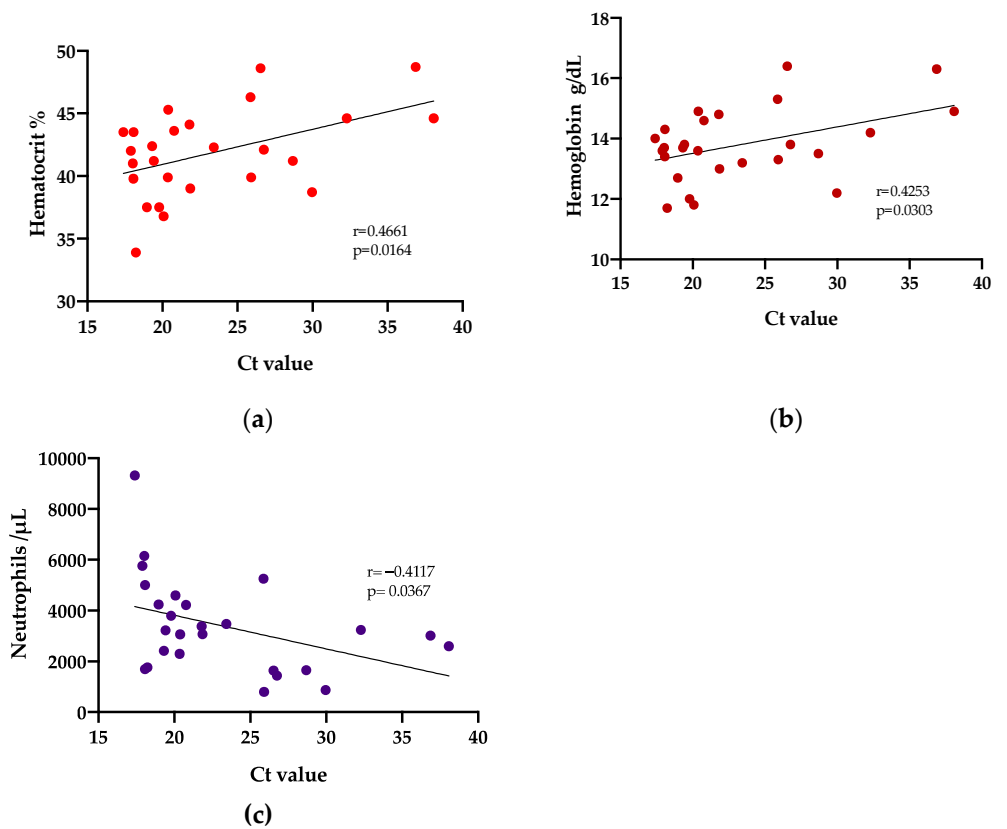

**Figure S3.** Correlation analysis of cycle threshold with blood cell indices. (a) Cycle threshold vs. hematocrit, (b) Cycle threshold vs. hemoglobin, and (c) Cycle threshold vs. neutrophils.

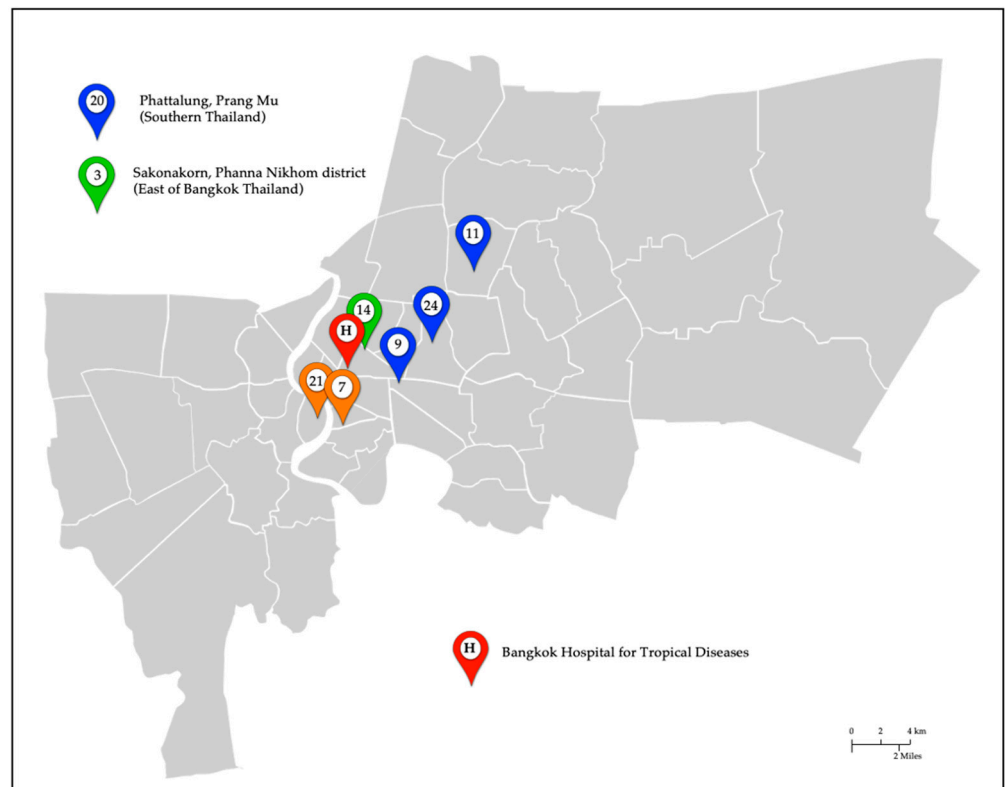

**Figure S4.** Distribution of identified clusters of closely related strains of chikungunya virus within Bangkok. Markers in the colors orange, blue, green represents the clusters identified by a phylogenetic analysis of Figure 2 and the numbers represent the last two digits of the strain identification number as shown in in Table S3.

**Table S1.**

| Demographic and clinical data | Female=14                                                   | Male=12                                      | p value      |
|-------------------------------|-------------------------------------------------------------|----------------------------------------------|--------------|
| Age, years                    | 48.5 (31.5–58.7)                                            | 45 (37.5–50.7)                               | 0.520        |
| Thai national                 | 13 (93)                                                     | 12 (92)                                      | 0.910        |
| Foreigner                     | 1 (7.1)                                                     | 1 (8.3)                                      |              |
| Comorbidity                   | 1 (7.1)                                                     | 2 (17%)                                      | 0.449        |
| Day of presentation, days     | 2 (2–3)                                                     | 3 (2–3)                                      | 0.380        |
| Viral load, copies/mL         | $2.0 \times 10^5$ ( $1.5 \times 10^4$ – $5.6 \times 10^6$ ) | $4.3 \times 10^4$ (443 – $3.7 \times 10^5$ ) | 0.157        |
| Temperature, °C               | 38.25 (37.95–39)                                            | 38.25 (37–39.18)                             | 0.706        |
| Fever                         | 12 (86)                                                     | 8 (67)                                       | 0.250        |
| Arthralgia                    | 14 (100)                                                    | 10 (83)                                      | 0.112        |
| Arthritis                     | 7 (50)                                                      | 5 (42)                                       | 0.671        |
| Myalgia                       | 8 (57)                                                      | 8 (67)                                       | 0.619        |
| Rash                          | 5 (35)                                                      | 7 (58)                                       | 0.249        |
| Pruritus                      | 3 (21)                                                      | 4 (33)                                       | 0.495        |
| Headache                      | 3 (21)                                                      | 1 (8)                                        | 0.356        |
| Conjunctivitis                | 2 (14)                                                      | 1 (8)                                        | 0.636        |
| Diarrhea                      | 0                                                           | 2 (17)                                       | 0.112        |
| Leukocytes/ $\mu$ L           | 3865 (3150–5300)                                            | 4900 (4200–6925)                             | 0.094        |
| Lymphocytes/ $\mu$ L          | 655 (336–950)                                               | 1092 (755–1345)                              | <b>0.012</b> |
| Neutrophils/ $\mu$ L          | 3142 (1630–4316)                                            | 3147 (2369–4999)                             | 0.572        |
| Eosinophils/ $\mu$ L          | 23.35 (0–84.98)                                             | 0 (0–93.5)                                   | 0.582        |
| Monocytes/ $\mu$ L            | 117.5 (87.25–231.5))                                        | 156.5 (107.25–268.65)                        | 0.440        |
| Basophils/ $\mu$ L            | 0 (0–4.9)                                                   | 0 (0–41.85)                                  | 0.245        |
| Atypical lymphocytes/ $\mu$ L | 68.5 (0–183)                                                | 176 (75–473)                                 | <b>0.052</b> |
| Bands/ $\mu$ L                | 150 (24–312)                                                | 135 (13–430)                                 | 0.856        |
| Hemoglobin g/dL               | 13.35 (12.15–13.85)                                         | 14.5 (13.6–15.2)                             | <b>0.013</b> |
| Hematocrit, %                 | 40.55 (38.4–42.68)                                          | 44.35 (41.05–46.05)                          | <b>0.019</b> |
| Platelets $10^3/\mu$ L        | 209 (132–254)                                               | 175 (149–215)                                | 0.537        |

**Table S2.**

| Clinical data        | Group A          | Group B          | p value |
|----------------------|------------------|------------------|---------|
| Fever                | 12 (92.3)        | 8 (61.5)         | 0.063   |
| Arthralgia           | 11 (84.6)        | 13 (100)         | 0.141   |
| Large joints         | 11 (84.6)        | 10 (76.9)        | 0.619   |
| Small joints         | 10 (76.9)        | 10 (76.9)        | 1.000   |
| Both joints          | 10 (76.9)        | 8 (61.5)         | 0.395   |
| Arthritis            | 5 (38.5)         | 7 (53.8)         | 0.431   |
| Myalgia              | 7 (53.8)         | 9 (69.2)         | 0.420   |
| Rash                 | 5 (38.5)         | 7 (53.8)         | 0.431   |
| Pruritus             | 3 (23.1)         | 4 (30.8)         | 0.658   |
| Headache             | 3 (23.1)         | 1 (7.7)          | 0.277   |
| Conjunctivitis       | 1 (7.7)          | 2 (15.4)         | 0.539   |
| Diarrhea             | 0                | 2 (15.4)         | 0.414   |
| Leukocytes/ $\mu$ L  | 5100 (3615–5850) | 4500 (3400–4900) | 0.329   |
| Lymphocytes/ $\mu$ L | 893 (673–1231)   | 740 (603–1323)   | 0.442   |
| Neutrophils/ $\mu$ L | 3469 (1648–4797) | 3060 (2027–3802) | 0.663   |
| Eosinophils/ $\mu$ L | 4.1 (0–86)       | 0 (0–81)         | 0.722   |
| Monocytes/ $\mu$ L   | 153 (59–268)     | 135 (103–219)    | 0.959   |
| Basophils/ $\mu$ L   | 0 (0–26)         | 0 (0–14)         | 0.510   |

|                                     |                                                             |                                                             |       |
|-------------------------------------|-------------------------------------------------------------|-------------------------------------------------------------|-------|
| Atypical lymphocytes/ $\mu\text{L}$ | 76 (0–206)                                                  | 147 (46.5–269)                                              | 0.624 |
| Bands/ $\mu\text{L}$                | 156 (27–362)                                                | 144 (16–316)                                                | 0.796 |
| Hemoglobin g/dL                     | 13.3 (12.45–14.15)                                          | 13.8 (13.65–14.85)                                          | 0.101 |
| Hematocrit %                        | 41.2 (38.1–43.5)                                            | 42.4 (40.45–44.6)                                           | 0.270 |
| Platelets $10^3/\mu\text{L}$        | 171 (131–240)                                               | 219 (151–240)                                               | 0.369 |
| Viral load copies/mL                | $5.0 \times 10^4$ ( $3.0 \times 10^3$ – $5.2 \times 10^5$ ) | $1.8 \times 10^5$ ( $5.9 \times 10^3$ – $4.1 \times 10^5$ ) | 0.837 |

Frequencies of clinical manifestations are presented as actual numbers and percentages, while hematological profiles are presented as medians and IQR. Atypical lymphocytes are lymphocytes observed to be large with varying morphology, similar to those seen in infectious mononucleosis.

Table S3.

| Strain     | Collection date | Sex | Age (years) | Ct    | Viral load (copies/mL) | Accession No.         |
|------------|-----------------|-----|-------------|-------|------------------------|-----------------------|
| THBKK19-01 | October 2019    | F   | 40          | 26.76 | 4.73E+03               | LC598202              |
| THBKK19-02 | October 2019    | M   | 50          | 36.87 | 9.99E+00               | Undetermined          |
| THBKK19-03 | October 2019    | M   | 43          | 28.69 | 1.31E+03               | LC598203              |
| THBKK19-04 | October 2019    | F   | 24          | 19.79 | 2.66E+05               | LC580256 <sup>b</sup> |
| THBKK19-05 | October 2019    | M   | 44          | 38.08 | 4.86E+00               | Undetermined          |
| THBKK19-06 | October 2019    | M   | 55          | 20.38 | 1.87E+05               | LC580257 <sup>b</sup> |
| THBKK19-07 | October 2019    | F   | 61          | 29.47 | 8.24E+02               | LC598204              |
| THBKK19-08 | October 2019    | F   | 49          | 19.43 | 3.29E+05               | LC580258 <sup>b</sup> |
| THBKK19-09 | October 2019    | M   | 17          | 26.54 | 4.73E+03               | LC580259 <sup>b</sup> |
| THBKK19-10 | October 2019    | M   | 37          | 32.28 | 1.54E+02               | Undetermined          |
| THBKK19-11 | October 2019    | M   | 28          | 21.8  | 8.00E+04               | LC580260 <sup>b</sup> |
| THBKK19-12 | October 2019    | F   | 58          | 25.91 | 6.90E+03               | LC580261 <sup>b</sup> |
| THBKK19-13 | October 2019    | M   | 39          | 20.36 | 1.89E+05               | LC580262 <sup>b</sup> |
| THBKK19-14 | October 2019    | F   | 64          | 18.06 | 7.48E+05               | LC580263 <sup>b</sup> |
| THBKK19-15 | October 2019    | F   | 32          | 20.77 | 1.48E+05               | LC580264 <sup>b</sup> |
| THBKK19-16 | October 2019    | M   | 55          | 25.87 | 7.08E+03               | LC580265 <sup>b</sup> |
| THBKK19-17 | October 2019    | F   | 61          | 20.08 | 1.55E+05               | LC580266 <sup>b</sup> |
| THBKK19-18 | October 2019    | F   | 50          | 29.97 | 6.14E+02               | LC598205              |
| THBKK19-19 | October 2019    | F   | 67          | 18.08 | 7.39E+05               | LC580267 <sup>b</sup> |
| THBKK19-20 | October 2019    | M   | 46          | 18.97 | 4.35E+05               | LC580268 <sup>b</sup> |
| THBKK19-21 | October 2019    | F   | 39          | 17.39 | 1.87E+06               | LC580269 <sup>b</sup> |
| THBKK19-22 | October 2019    | F   | 25          | 18.23 | 5.03E+05               | LC598206              |
| THBKK19-23 | October 2019    | M   | 48          | 17.9  | 6.21E+05               | LC598207              |
| THBKK19-24 | October 2019    | F   | 30          | 23.42 | 1.87E+04               | LC598208              |
| THBKK19-25 | October 2019    | F   | 55          | 18.02 | 5.75E+05               | LC598209              |
| THBKK19-26 | October 2019    | F   | 48          | 19.31 | 2.53E+05               | LC598210              |

Table S4.

| Position           | Structural polyprotein |     |     |     |      |      |      |
|--------------------|------------------------|-----|-----|-----|------|------|------|
|                    | 73                     | 530 | 546 | 589 | 1020 | 1035 | 1126 |
|                    | capsid                 |     | E2  |     |      | E1   |      |
|                    | 73                     | 205 | 221 | 264 | 211  | 226  | 317  |
| Amino acid residue | R                      | S   | K   | A   | E    | A    | V    |

Table S5.

| Day 2 of illness      | Chikungunya=7 | Dengue=7 | p value      |
|-----------------------|---------------|----------|--------------|
| Fever                 | 6 (85.7)      | 7 (100)  | 0.299        |
| Headache              | 2 (28.6)      | 7 (100)  | <b>0.005</b> |
| Myalgia or arthralgia | 7 (100)       | 6 (85.7) | 0.299        |
| Rash                  | 3 (42.9)      | 4 (57.1) | 0.593        |
| Bleeding              | 0             | 0        | NA           |

|                               |                       |                  |              |
|-------------------------------|-----------------------|------------------|--------------|
| Leukocytes/ $\mu$ L           | 5600 (3600–8000)      | 3500 (2300–5400) | 0.085        |
| Lymphocytes/ $\mu$ L          | 800 (336–1110)        | 560 (345–822)    | 0.482        |
| Neutrophils/ $\mu$ L          | 4592 (3042–5760)      | 2590 (1587–3450) | 0.180        |
| Atypical Lymphocytes/ $\mu$ L | 61 (0–180)            | 0 (0–46)         | 0.096        |
| Hemoglobin g/dL               | 13 (12.2–14)          | 15.4 (13.8–15.6) | <b>0.048</b> |
| Hematocrit %                  | 39 (37.5–43.5)        | 44.5 (40.4–45.3) | 0.141        |
| Platelets $10^3/\mu$ L        | 178 (133–294)         | 154 (68–212)     | 0.142        |
| <b>Day 3 of illness</b>       | <b>Chikungunya=15</b> | <b>Dengue=22</b> |              |
| Fever                         | 12 (80)               | 22 (100)         | <b>0.029</b> |
| Headache                      | 2 (13.1)              | 20 (90.9)        | <b>0.000</b> |
| Myalgia or arthralgia         | 14 (93.3)             | 19 (86.4)        | 0.503        |
| Rash                          | 7 (46.7)              | 12 (54.5)        | 0.638        |
| Bleeding                      | 0                     | 5 (22.7)         | <b>0.047</b> |
| Leukocytes/ $\mu$ L           | 4100 (3200–4900)      | 3000 (2380–4200) | 0.068        |
| Lymphocytes/ $\mu$ L          | 735 (576–1024)        | 619 (421–997)    | 0.496        |
| Neutrophils/ $\mu$ L          | 2419 (1694–3381)      | 1659 (1214–2436) | <b>0.041</b> |
| Atypical Lymphocytes/ $\mu$ L | 148 (49–243)          | 190 (72–394)     | 0.395        |
| Hemoglobin g/dL               | 13.8 (13.4–14.9)      | 13.9 (12.3–15.0) | 0.699        |
| Hematocrit %                  | 42.1 (39.9–44.6)      | 41.1 (37.4–43.5) | 0.240        |
| Platelets $10^3/\mu$ L        | 179 (131–220)         | 87 (62.2–127)    | <b>0.000</b> |
| <b>Day 4 of illness</b>       | <b>Chikungunya=3</b>  | <b>Dengue=43</b> |              |
| Fever                         | 1 (33.3)              | 43 (100)         | <b>0.000</b> |
| Headache                      | 0                     | 41 (95.3)        | <b>0.000</b> |
| Myalgia or arthralgia         | 3 (100)               | 33 (76.7)        | 0.345        |
| Rash                          | 1 (33.3)              | 21 (48.8)        | 0.603        |
| Bleeding                      | 0                     | 12 (27.9)        | 0.287        |
| Leukocytes, $10^3/\mu$ L      | 4900 (3600)           | 2900 (2300–4200) | 0.071        |
| Lymphocytes, %                | 1353 (1323)           | 744 (456–1248)   | 0.065        |
| Neutrophils, %                | 3234 (1656)           | 1406 (1100–1974) | <b>0.039</b> |
| Atypical Lymphocytes, %       | 147 (0)               | 330 (140–720)    | 0.175        |
| Hemoglobin, %                 | 14.2 (13.5)           | 15 (13.3–16)     | 0.533        |
| Hematocrit, %                 | 44.6 (41.2)           | 44 (40.3–47.1)   | 0.965        |
| Platelets, $10^3/\mu$ L       | 226 (171)             | 62.5 (30–87.2)   | 0.000        |

The data are presented as medians and IQR. Atypical lymphocytes are lymphocytes observed to be large with varying morphology, similar to those seen in infectious mononucleosis.
